# Supplementary material
Source: publisher figshare collection journal article supplement (https://springernature.figshare.com/ndownloader/files/20161367)
Supplement: Supplementary file 1 [file 20161367]

**Additional Figure**


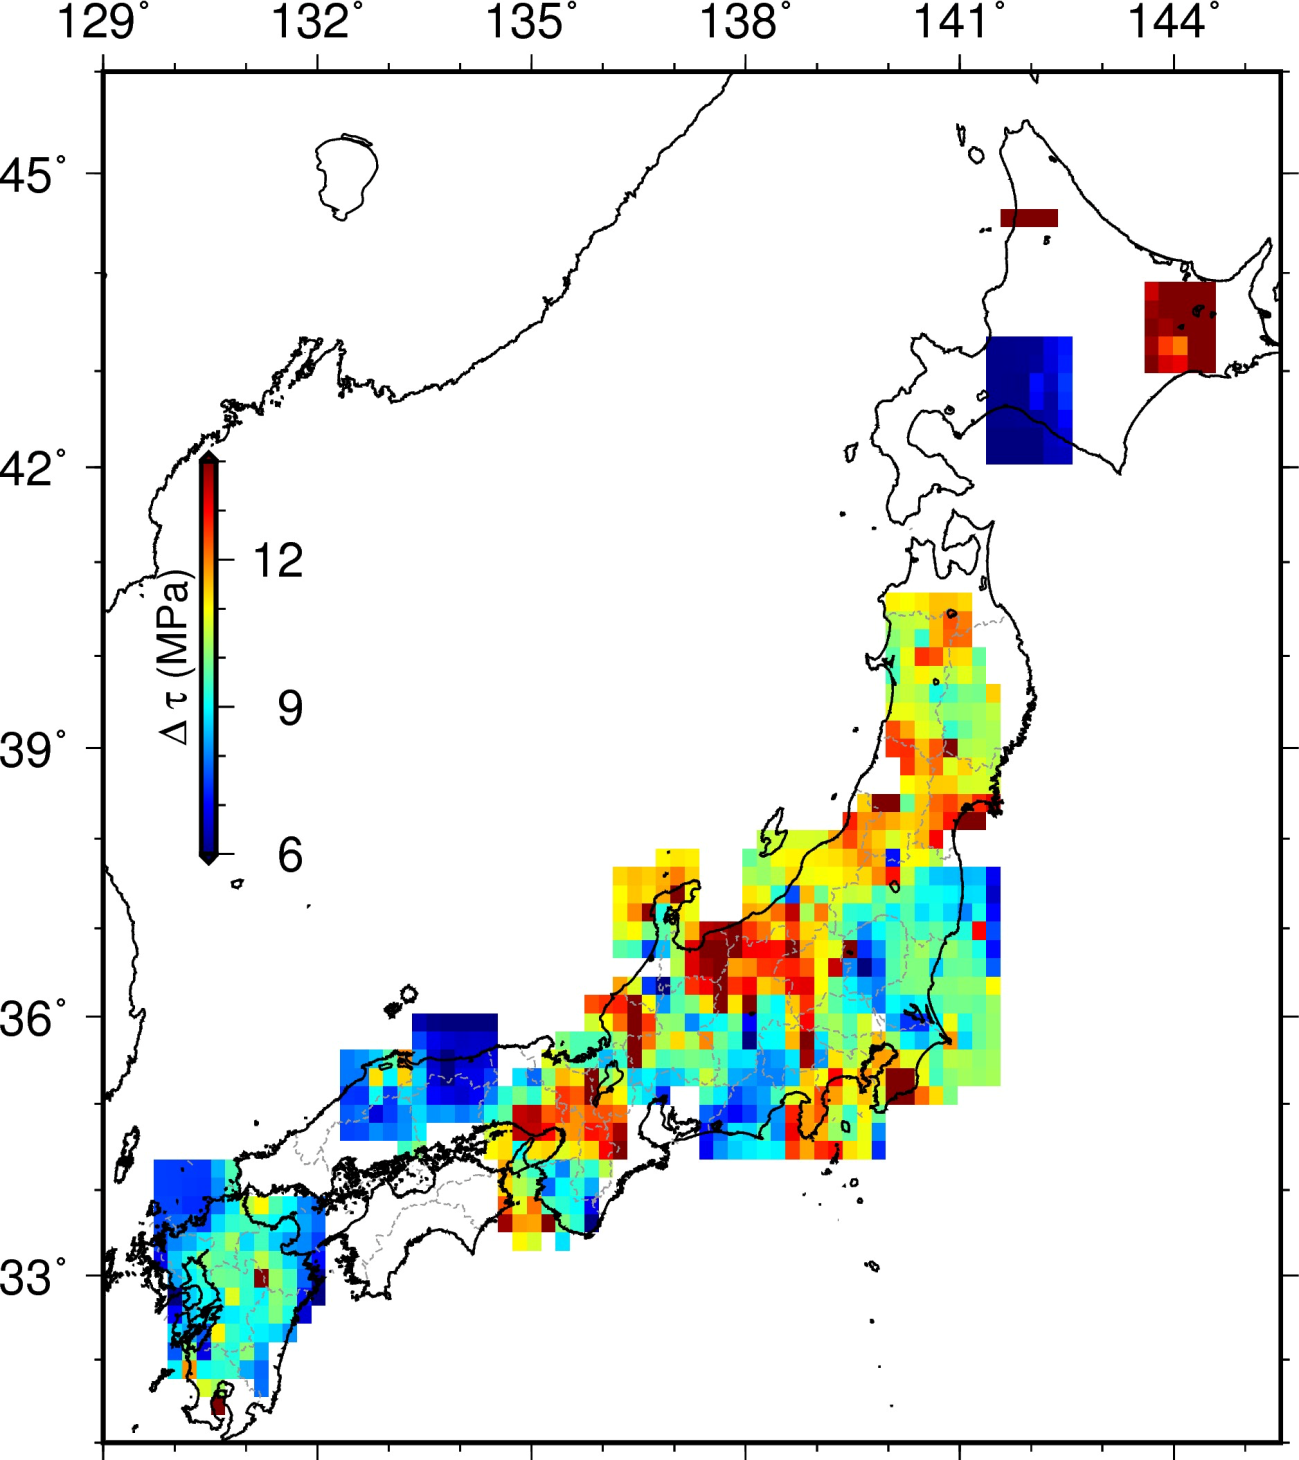


**Fig. S1.** Spatial distribution of the stress drop estimated based on the circular symmetrical rupture model.
